# Supplementary material
Source: PubMed Central journal article supplement (PMC2823918)
Supplement: 0911813107_pnas.0911813107_SI.pdf [file 0911813107_pnas.0911813107_SI.pdf]

# Supporting Information

McGowan et al. 10.1073/pnas.0911813107

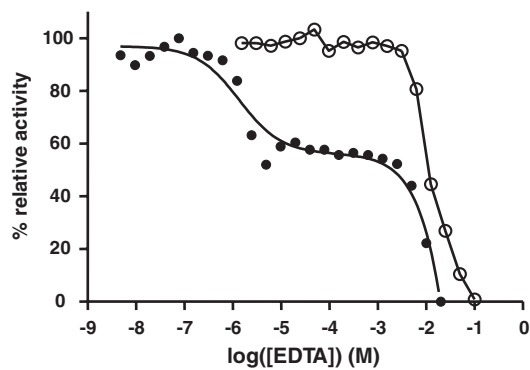

**Fig. S1.** Metal binding of *PflA*-M1 (Open Circle) versus *PfA*-M17 (Closed Circle) (1). Graph shows relative enzymatic activity (%) against increasing EDTA concentration (M).

1 Maric S, et al. (2009) The M17 leucine aminopeptidase of the malaria parasite *Plasmodium falciparum*: Importance of active site metal ions in the binding of substrates and inhibitors. *Biochemistry* 48(23):5435–5439







**Table S4. Comparison of inhibitor interactions with PfA-M1 (2) and PfA-M17**

| Enzyme                | Bestatin |            | Co4     |            |
|-----------------------|----------|------------|---------|------------|
|                       | PfA-M17  | PfA-M1 (2) | PfA-M17 | PfA-M1 (2) |
| K <sub>i</sub> (nM)   | 25 (4)   | 478.2      | 13 (4)  | 79         |
| Metallo-bonds         | 11       | 5          | 12      | 5          |
| H-bonds               | 12       | 7          | 8       | 5          |
| vdw interactions      | 9        | 7          | 8       | 10         |
| BSA (Å <sup>2</sup> ) | 44.2     | 23.8       | 195.1   | 62.2       |

2 McGowan S et al. (2009) Structural basis for the inhibition of the essential *Plasmodium falciparum* M1 neutral aminopeptidase. *Proc Natl Acad Sci USA* 106(8):2537–2542

4 Skinner-Adams TS et al. (2007) Identification of phosphinate dipeptide analog inhibitors directed against the *Plasmodium falciparum* M17 leucine aminopeptidase as lead antimalarial compounds. *J Med Chem* 50(24):6024–6031.
